# Supplementary material for: Fgfr1 regulates development through the combinatorial use of signaling proteins
Source: PubMed Central journal article supplement — Genes Dev. 2015 Sep 1;29(17):1863–74. doi: 10.1101/gad.264994.115 (PMC4573858; doi:10.1101/gad.264994.115), 2015-09-01
Supplement: supp_29.17.1863_Supp_Table_1.pdf [file supp_29.17.1863_Supp_Table_1.pdf]

|                             | 6 weeks    |          |           |         |         | 14 weeks   |          |           |         |         |
|-----------------------------|------------|----------|-----------|---------|---------|------------|----------|-----------|---------|---------|
|                             | WT Average | WT StDev | C Average | C StDev | P-value | WT Average | WT StDev | C Average | C StDev | P-value |
| WBC (K/ $\mu$ L)            | 2.40       | 0.97     | 2.35      | 0.62    | 0.93    | 2.40       | 0.97     | 2.45      | 0.62    | 0.93    |
| RBC (M/ $\mu$ L)            | 8.03       | 0.86     | 7.38      | 1.14    | 0.37    | 8.03       | 0.86     | 9.55      | 0.47    | 0.02    |
| HGB (g/dl)                  | 13.20      | 1.13     | 11.90     | 2.07    | 0.27    | 13.20      | 1.13     | 14.43     | 0.68    | 0.10    |
| HCT (%)                     | 42.72      | 4.12     | 38.98     | 6.79    | 0.34    | 42.72      | 4.12     | 47.13     | 3.29    | 0.13    |
| MCV (fL)                    | 53.26      | 0.95     | 52.65     | 1.35    | 0.45    | 53.26      | 0.95     | 49.33     | 1.05    | 0.001   |
| MCH (pg)                    | 16.52      | 0.65     | 15.95     | 0.68    | 0.24    | 16.52      | 0.65     | 15.10     | 0.08    | 0.004   |
| MCHC (%)                    | 31.02      | 0.75     | 30.08     | 0.57    | 0.08    | 31.02      | 0.75     | 30.63     | 0.67    | 0.44    |
| Platelet count (K/ $\mu$ L) | 276.60     | 194.65   | 327.50    | 77.32   | 0.64    | 276.60     | 194.65   | 443.25    | 61.91   | 0.15    |
| Polys (%/ $\mu$ L)          | 14.60      | 3.91     | 18.75     | 7.09    | 0.30    | 14.60      | 3.91     | 21.00     | 9.97    | 0.22    |
| Polys (ABS/ $\mu$ L)        | 376.00     | 239.75   | 470.00    | 273.62  | 0.60    | 376.00     | 239.75   | 550.00    | 386.87  | 0.43    |
| Lymph (%/ $\mu$ L)          | 76.80      | 7.82     | 76.25     | 8.46    | 0.92    | 76.80      | 7.82     | 74.75     | 11.03   | 0.75    |
| Lymph (ABS/ $\mu$ L)        | 1788.00    | 549.79   | 1760.00   | 329.04  | 0.93    | 1788.00    | 549.79   | 1790.00   | 286.94  | 0.99    |
| Monos (%/ $\mu$ L)          | 5.40       | 3.97     | 3.50      | 2.08    | 0.42    | 5.40       | 3.97     | 2.75      | 0.96    | 0.24    |
| Monos (ABS/ $\mu$ L)        | 152.00     | 128.72   | 90.00     | 74.39   | 0.42    | 152.00     | 128.72   | 70.00     | 40.00   | 0.26    |
| Eos (%/ $\mu$ L)            | 3.20       | 1.30     | 1.50      | 1.00    | 0.07    | 3.20       | 1.30     | 1.50      | 0.58    | 0.05    |
| Eos (ABS/ $\mu$ L)          | 84.00      | 67.31    | 30.00     | 21.60   | 0.17    | 84.00      | 67.31    | 40.00     | 18.26   | 0.25    |
| Baso (%/ $\mu$ L)           | 0.00       | 0.00     | 0.00      | 0.00    | N/A     | 0.00       | 0.00     | 0.00      | 0.00    | N/A     |
| Baso (ABS/ $\mu$ L)         | 0.00       | 0.00     | 0.00      | 0.00    | N/A     | 0.00       | 0.00     | 0.00      | 0.00    | N/A     |
| Glucose, serum (mg/dl)      | 213.20     | 17.81    | 211.00    | 56.73   | 0.94    | 213.20     | 17.81    | 195.25    | 33.57   | 0.33    |
| BUN (mg/dl)                 | 24.80      | 3.70     | 22.25     | 6.85    | 0.50    | 24.80      | 3.70     | 25.50     | 2.38    | 0.75    |
| Creatinine (mg/dl)          | 0.36       | 0.05     | 0.35      | 0.10    | 0.85    | 0.36       | 0.05     | 0.38      | 0.05    | 0.68    |
| Calcium (mg/dl)             | 9.28       | 0.63     | 9.10      | 0.56    | 0.70    | 9.28       | 0.63     | 8.48      | 0.81    | 0.14    |
| Phosphorus (mg/dl)          | 9.78       | 1.13     | 12.70     | 5.29    | 0.26    | 9.78       | 1.13     | 7.58      | 2.39    | 0.11    |
| Total Protein (g/dl)        | 4.14       | 0.18     | 3.58      | 1.05    | 0.27    | 4.14       | 0.18     | 4.38      | 0.26    | 0.16    |
| Albumin (g/dl)              | 2.56       | 0.11     | 2.20      | 0.67    | 0.27    | 2.56       | 0.11     | 2.50      | 0.22    | 0.61    |
| Globulin (g/dl)             | 1.56       | 0.09     | 1.38      | 0.39    | 0.33    | 1.56       | 0.09     | 1.88      | 0.05    | 0.00    |
| Alb/glob Ratio              | 1.96       | 0.69     | 2.38      | 0.84    | 0.44    | 1.96       | 0.69     | 1.33      | 0.10    | 0.12    |
| ALT (U/L)                   | 24.80      | 9.12     | 19.25     | 3.77    | 0.30    | 24.80      | 9.12     | 24.00     | 1.83    | 0.87    |
| AST (U/L)                   | 141.20     | 80.02    | 75.50     | 18.08   | 0.16    | 141.20     | 80.02    | 75.25     | 26.21   | 0.16    |
| Calcium/phosphorus          | 1.18       | 0.48     | 1.05      | 0.53    | 0.71    | 1.18       | 0.48     | 1.23      | 0.38    | 0.88    |
| Cholesterol (mg/dl)         | 87.20      | 8.29     | 67.00     | 23.43   | 0.12    | 87.20      | 8.29     | 102.00    | 17.11   | 0.13    |
