# Supplementary material for: Fgfr1 regulates development through the combinatorial use of signaling proteins
Source: PubMed Central journal article supplement — Genes Dev. 2015 Sep 1;29(17):1863–74. doi: 10.1101/gad.264994.115 (PMC4573858; doi:10.1101/gad.264994.115), 2015-09-01
Supplement: supp_29.17.1863_Supp_Table_2.pdf [file supp_29.17.1863_Supp_Table_2.pdf]

|                      | 6 weeks    |          |             |           |         | 14 Weeks   |          |             |           |         |
|----------------------|------------|----------|-------------|-----------|---------|------------|----------|-------------|-----------|---------|
|                      | WT Average | WT StDev | CPG Average | CPG StDev | P-Value | WT Average | WT StDev | CPG Average | CPG StDev | P-Value |
| WBC (K/uL)           | 1.38       | 0.60     | 1.56        | 0.73      | 0.690   | 1.86       | 0.46     | 2.44        | 0.76      | 0.188   |
| RBC (M/uL)           | 8.32       | 0.59     | 8.50        | 0.55      | 0.638   | 9.57       | 0.34     | 7.74        | 0.71      | 0.002   |
| HBG (g/dl)           | 14.03      | 0.71     | 14.32       | 0.87      | 0.593   | 14.52      | 0.76     | 11.60       | 1.19      | 0.003   |
| HCT (%)              | 43.30      | 2.93     | 44.26       | 2.83      | 0.636   | 44.94      | 2.13     | 36.32       | 3.32      | 0.002   |
| MCV (fL)             | 52.10      | 0.85     | 52.12       | 1.65      | 0.982   | 42.96      | 8.69     | 46.82       | 0.40      | 0.377   |
| MCH (pg)             | 16.80      | 0.37     | 16.84       | 0.81      | 0.925   | 15.14      | 0.47     | 14.92       | 0.40      | 0.449   |
| MCHC (%)             | 32.30      | 0.49     | 32.34       | 0.69      | 0.922   | 32.28      | 0.70     | 31.92       | 0.71      | 0.443   |
| Platet count (K/uL)  | 450.75     | 160.34   | 406.60      | 199.23    | 0.724   | 309.40     | 176.98   | 451.20      | 138.43    | 0.198   |
| Polys (%/ul)         | 29.75      | 5.44     | 25.00       | 6.86      | 0.284   | 14.60      | 9.40     | 23.20       | 6.83      | 0.140   |
| Polys (ABS/ul)       | 417.50     | 208.23   | 420.00      | 292.23    | 0.988   | 286.00     | 169.50   | 574.00      | 249.66    | 0.070   |
| Lymph (%/ul)         | 65.00      | 8.60     | 66.00       | 7.65      | 0.861   | 60.40      | 26.70    | 70.80       | 6.18      | 0.440   |
| Lymph (ABS/ul)       | 870.00     | 331.96   | 996.00      | 369.77    | 0.608   | 1208.00    | 635.51   | 1718.00     | 533.45    | 0.208   |
| Monos (%/ul)         | 4.50       | 3.00     | 7.40        | 2.19      | 0.162   | 17.80      | 29.22    | 3.00        | 1.00      | 0.321   |
| Monos (ABS/ul)       | 70.00      | 58.31    | 118.00      | 67.23     | 0.290   | 246.00     | 333.96   | 78.00       | 35.64     | 0.325   |
| Eos (%/ul)           | 0.75       | 1.50     | 1.60        | 1.82      | 0.467   | 5.20       | 3.11     | 3.00        | 2.45      | 0.251   |
| Eos (ABS/ul)         | 17.50      | 35.00    | 26.00       | 34.35     | 0.727   | 106.00     | 63.48    | 70.00       | 59.16     | 0.381   |
| Baso (%/ul)          | 0.00       | 0.00     | 0.00        | 0.00      | N/A     | 0.00       | 0.00     | 0.00        | 0.00      | N/A     |
| ABS (%/ul)           | 0.00       | 0.00     | 0.00        | 0.00      | N/A     | 0.00       | 0.00     | 0.00        | 0.00      | N/A     |
| Glucose (mg/dl)      | 180.50     | 30.17    | 160.80      | 19.93     | 0.312   | 176.00     | 38.16    | 189.20      | 15.21     | 0.503   |
| BUN (mg/dl)          | 23.50      | 1.91     | 23.20       | 3.63      | 0.879   | 22.80      | 4.38     | 25.20       | 2.68      | 0.333   |
| Creatinine (mg/dl)   | <0.4       | 0.00     | <0.4        | 0.00      | N/A     | <0.4       |          | <0.4        | 0.00      | N/A     |
| Calcium (mg/dl)      | 8.15       | 0.81     | 7.40        | 1.57      | 0.389   | 7.72       | 1.20     | 22.24       | 32.29     | 0.372   |
| phosphorus (mg/dl)   | 9.55       | 1.81     | 12.12       | 4.20      | 0.266   | 7.64       | 1.37     | 6.24        | 1.24      | 0.130   |
| Total Protein (g/dl) | 4.00       | 0.28     | 3.72        | 0.86      | 0.523   | 4.24       | 0.17     | 4.08        | 0.30      | 0.340   |
| Albumin (g/dl)       | 2.30       | 0.20     | 2.08        | 0.48      | 0.393   | 2.20       | 0.28     | 2.16        | 0.17      | 0.794   |
| Globulin (g/dl)      | 1.70       | 0.12     | 1.64        | 0.41      | 0.768   | 2.04       | 0.36     | 1.92        | 0.30      | 0.583   |
| Alb/Glob Ratio       | 1.35       | 0.10     | 1.28        | 0.18      | 0.484   | 1.10       | 0.35     | 1.14        | 0.21      | 0.831   |
| Bilirubin (mg/dl)    | 0.10       | 0.12     | 0.16        | 0.09      | 0.428   | 0.60       | 0.67     | 0.20        | 0.00      | 0.320   |
| ALP                  | 168.00     | 19.53    | 134.00      | 19.90     | 0.039   | 71.00      | 4.16     | 51.76       | 25.39     | 0.166   |
| GGT                  | 0.00       | 0.00     | 0.00        | 0.00      | N/A     | <0.4       | 0.00     | <0.2        | 0.00      | N/A     |
| ALT                  | 21.00      | 10.13    | 16.80       | 3.63      | 0.478   | 21.20      | 3.35     | 17.20       | 2.28      | 0.063   |
| AST                  | 77.50      | 31.17    | 76.80       | 23.18     | 0.972   | 81.20      | 46.08    | 102.80      | 34.51     | 0.428   |
| Cholesterol          | 97.00      | 11.60    | 86.40       | 23.08     | 0.405   | 96.80      | 9.12     | 98.80       | 9.96      | 0.749   |
