# Supplementary material for: Fgfr1 regulates development through the combinatorial use of signaling proteins
Source: PubMed Central journal article supplement — Genes Dev. 2015 Sep 1;29(17):1863–74. doi: 10.1101/gad.264994.115 (PMC4573858; doi:10.1101/gad.264994.115), 2015-09-01
Supplement: supp_29.17.1863_Supp_Table_3.pdf [file supp_29.17.1863_Supp_Table_3.pdf]

| Name            | Sequence (5' to 3')                              | Notes                                    |
|-----------------|--------------------------------------------------|------------------------------------------|
| Fgfr1cDNA_F1    | CGCTCCTGCGGGTACTTTGGC                            | Amplify Fgfr1c nt 49-3774 of NM_010206.3 |
| Fgfr1cDNA_R1    | ATCACGGCTCCCAGTCTCTGCC                           |                                          |
| Fgfr1_Flag3x_R2 | TCACTTATCGTCGTCATCCTTGTAACTTATCGTCGTCATCCTTGTAA- | Engineer Flag3x use with Fgfr1cDNA_F1    |
| (continued)     | ATCCTTATCGTCGTCATCCTTGTAACTGCGCCGTTTGAGTCCACTGT  |                                          |
| Fgfr1_V429A_F1  | ACAGCTAGCGCTGACTCCAGTGCATCC                      | Engineer V429A use with Fgfr1_L423A_R1   |
| Fgfr1_L423A_R1  | TACCTGTCTCCGGGCAGGGATGCTCTTGG                    | Engineer L423A use with Fgfr1_V429A_F1   |
| Fgfr1_Y776F_F1  | TGGACCAGTTCTCACCCAGCTTTCC                        | Engineer Y776F use with Fgfr1_Y766_R1    |
| Fgfr1_Y766F_R1  | GCGGTATGGACAGGTCCAGGAATTCC                       | Engineer Y766F use with Fgfr1_Y776_F1    |
| qFrs3F1         | GTCTACCCACACCCTCATTG                             | Frs3 qPCR Primers                        |
| qFrs3R1         | AACCCTGTGTCTGTGCTG                               |                                          |
| mB2m Ex1F       | ACTGACCGGCCTGTATGCTA                             | $\beta_2$ microglobulin qPCR Primers     |
| mB2m Ex2R       | TGAAGGACATATCTGACATCTCTA                         |                                          |
